# Supplementary material for: Meningioma cells express primary cilia but do not transduce ciliary Hedgehog signals
Source: PubMed Central journal article supplement (PMC7370519; doi:10.1186/s40478-020-00994-7), 2020-07-20

**Supplementary Fig. S1** Meningiomas harboring inactivating variants in *SUFU*, a negative regulator of the Hedgehog pathway, do not express primary cilia.

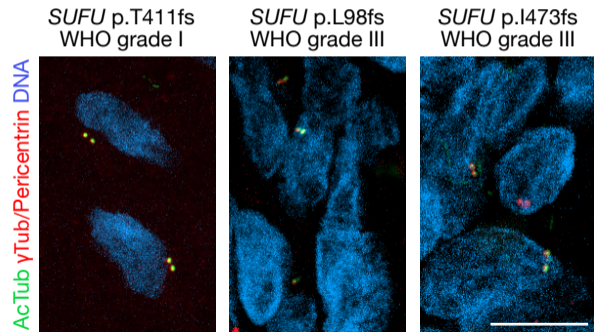

Supplement: 40478_2020_994_MOESM1_ESM.pdf [file 40478_2020_994_MOESM1_ESM.pdf]
